# Supplementary material for: Active and passive case-finding in tuberculosis-affected households in Peru: a 10-year prospective cohort study
Source: PubMed Central journal article supplement (PMC6483977; doi:10.1016/s1473-3099(18)30753-9), 2019-05

# THE LANCET Infectious Diseases

## Supplementary webappendix

This webappendix formed part of the original submission and has been peer reviewed. We post it as supplied by the authors.

Supplement to: Saunders MJ, Tovar MA, Collier D, et al. Active and passive case-finding in tuberculosis-affected households in Peru: a 10-year prospective cohort study. *Lancet Infect Dis* 2019; published online March 22. [http://dx.doi.org/10.1016/S1473-3099\(18\)30753-9](http://dx.doi.org/10.1016/S1473-3099(18)30753-9).

**Appendix Table 1: Summary of numbers of contacts screened by intensified study ACF.**

|                                                              | Testing only symptomatic contacts             |                                                |                                                    | Testing all contacts                     |
|--------------------------------------------------------------|-----------------------------------------------|------------------------------------------------|----------------------------------------------------|------------------------------------------|
|                                                              | During the first six months after recruitment | During the second six months after recruitment | During years 2-10 before the final household visit | At the final household visit (2015-2016) |
| <b>Number of contacts eligible for intensified study ACF</b> | 2,666                                         | 2,666                                          | 2,666                                              | 2,666                                    |
| <b>Number of TB tests performed</b>                          | 643                                           | 83                                             | 268                                                | 770                                      |

Appendix figure 1a: Cumulative risk of tuberculosis among contacts stratified by sex (n=2666).

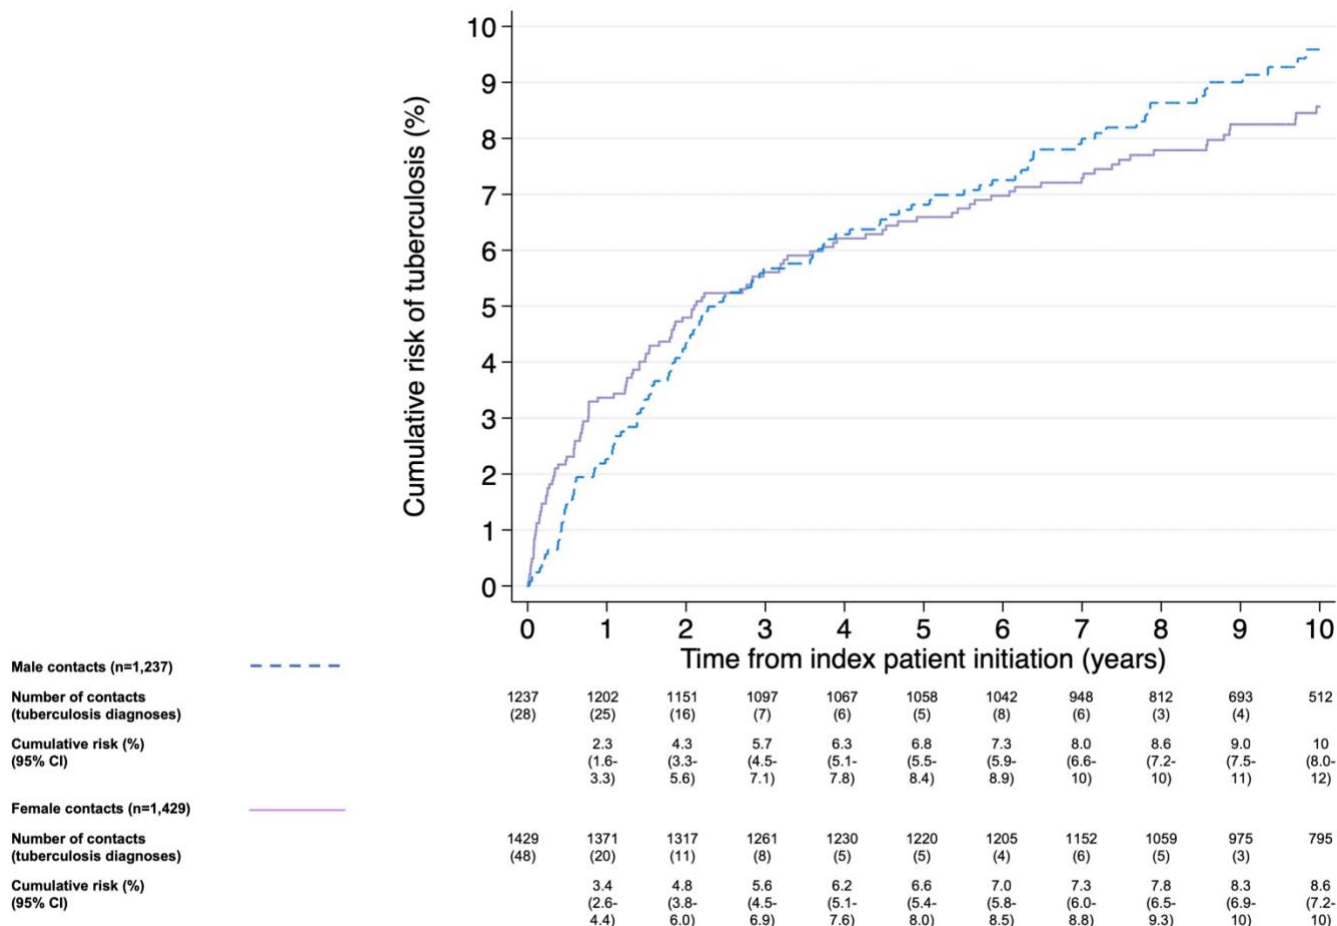

Appendix figure 1b: Incidence of tuberculosis among contacts (n=2666) stratified by sex. Error bars represent 95% confidence intervals.

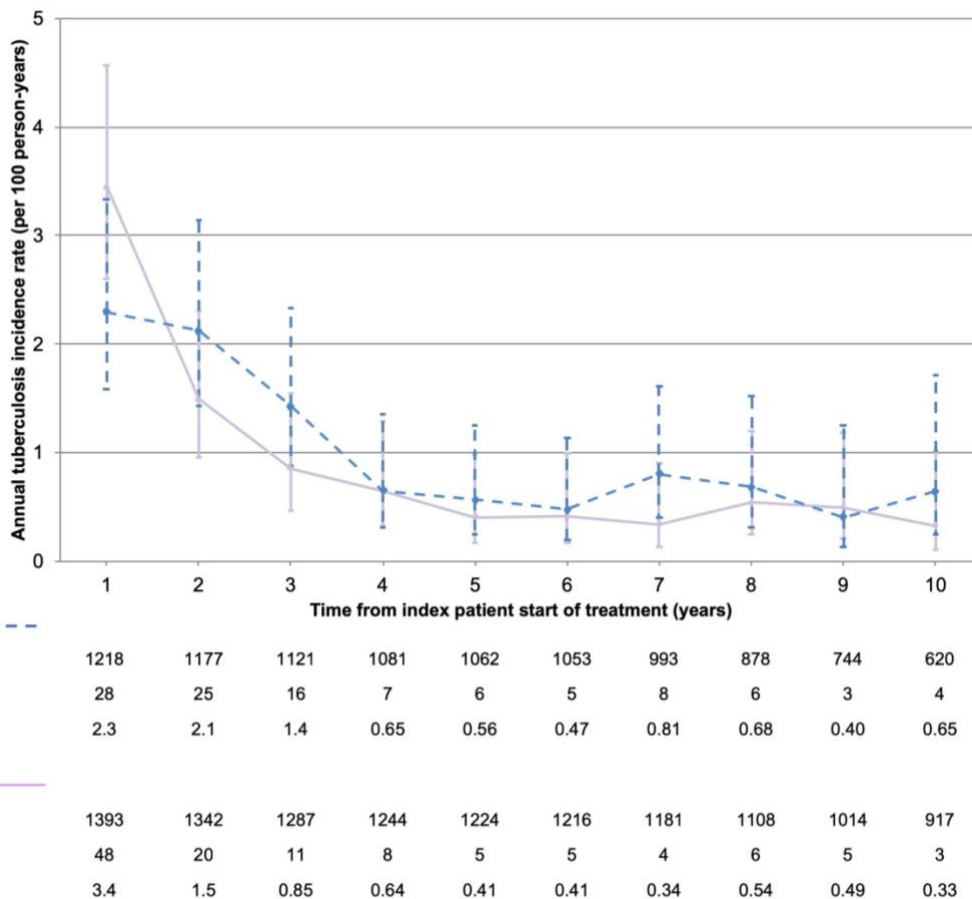

**Appendix figure 2a: Sputum smear grade results among contacts with data available for smear result (n=181) according to tuberculosis ascertainment strategy. The numbers within the bars indicate percentages. The p value indicates a two-sample proportion test comparing the proportion smear negative between the two ascertainment strategies.**

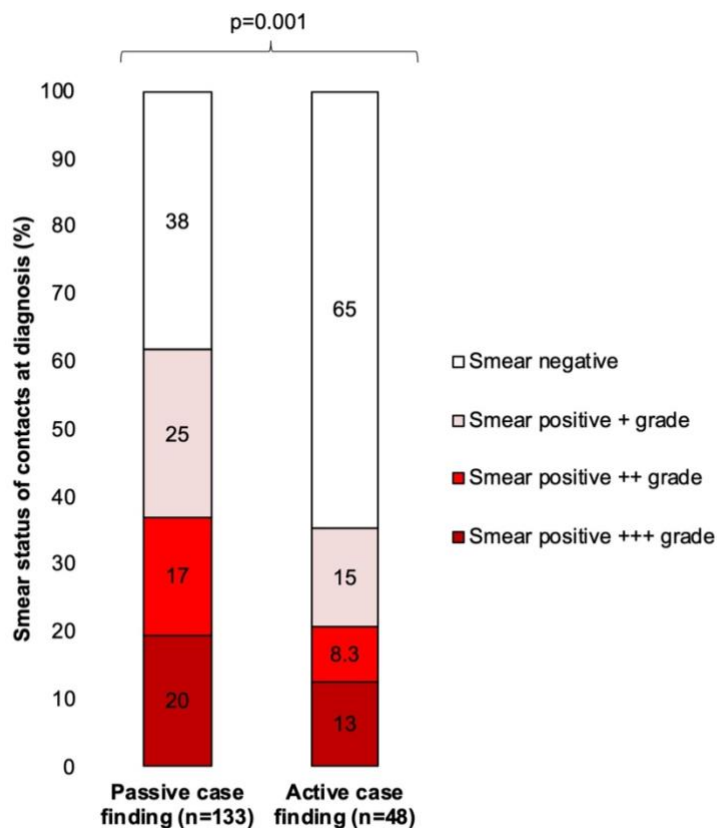

**Appendix figure 2b: Sputum smear grade and culture results among contacts with laboratory confirmed tuberculosis (n=170) according to tuberculosis ascertainment strategy. The numbers within the bars indicate percentages. The p value indicates a two-sample proportion test comparing the proportion smear negative, culture positive between the two ascertainment strategies.**

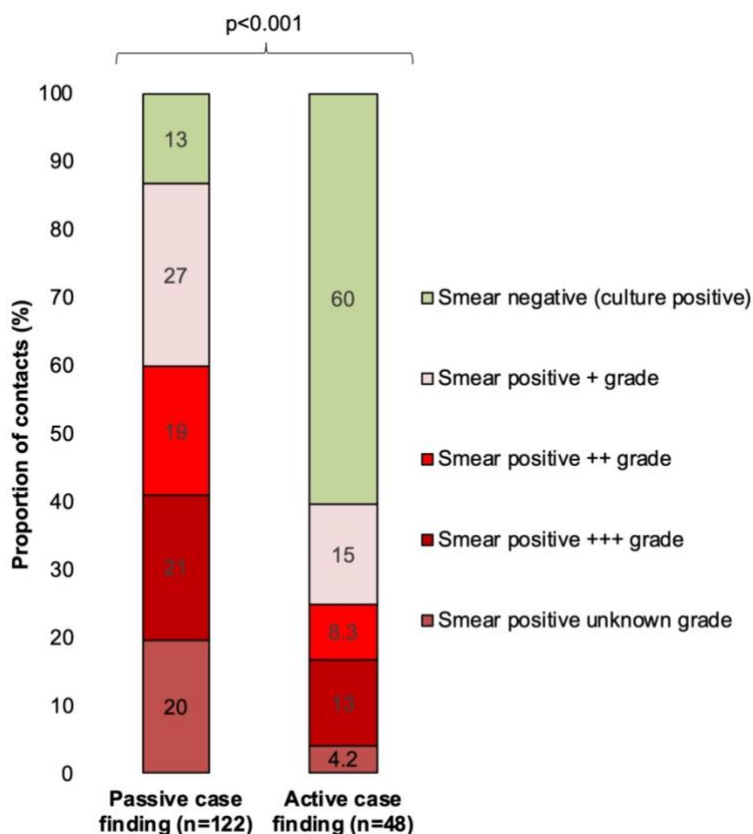

Supplement: mmc1.pdf [file mmc1.pdf]
